# Supplementary material for: Tomographic imaging of pore networks and connectivity of surfactant-directed mesoporous zeolites
Source: Royal Society of Chemistry journal article supplement (doi:10.1039/c7ta02612a), 2017-01-01
Supplement: c7ta02612a1.pdf [file c7ta02612a1.pdf]

## Tomographic Imaging of Pore Networks and Connectivity of Surfactant-Directed Mesoporous Zeolites

Seungyeop Lee,<sup>†,‡</sup> Changbum Jo<sup>‡</sup> and Ryong Ryoo<sup>\*,‡, §</sup>

<sup>†</sup>Graduate School of Nanoscience and Technology, KAIST, Daejeon 34141, Republic of Korea

<sup>‡</sup>Center for Nanomaterials and Chemical Reactions, Institute for Basic Science (IBS), Daejeon 34141, Republic of Korea

<sup>§</sup>Department of Chemistry, KAIST, Daejeon 34141, Republic of Korea

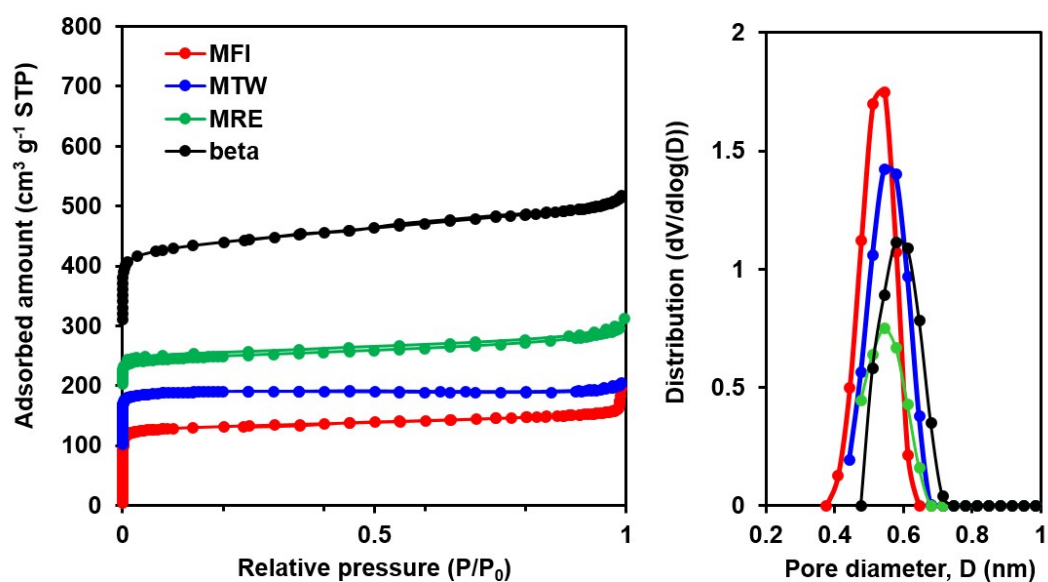

Fig. S1 Argon sorption isotherms of bulk zeolites at 87 K with offset by 100 cm<sup>3</sup> g<sup>-1</sup> STP, and corresponding micropore size distribution.

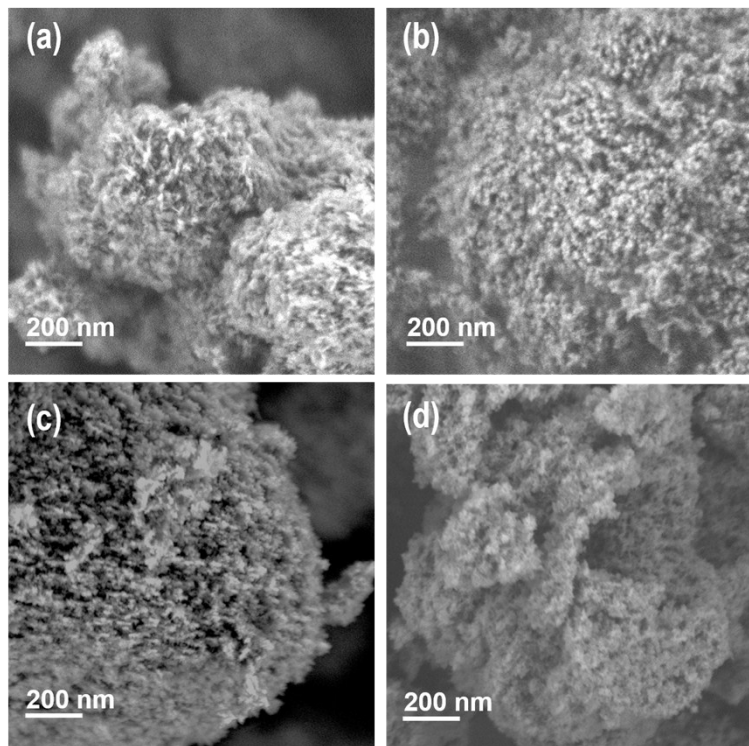

**Fig. S2** Low-magnification SEM images of (a) MFI, (b) \*MRE, (c) MTW and (d) beta nanosponges

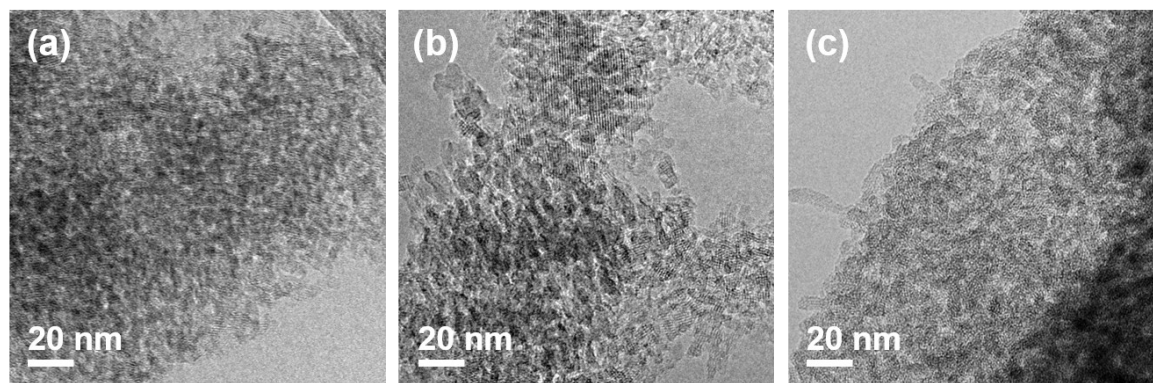

**Fig. S3** High-resolution TEM images of (a) \*MRE, (b) MTW, (c) beta nanosponges
